# Supplementary material
Source: PubMed Central journal article supplement (PMC5373494)
Supplement: NIHMS759462-supplement.pdf [file NIHMS759462-supplement.pdf]

A) JC-1 staining (mitochondrial polarization)

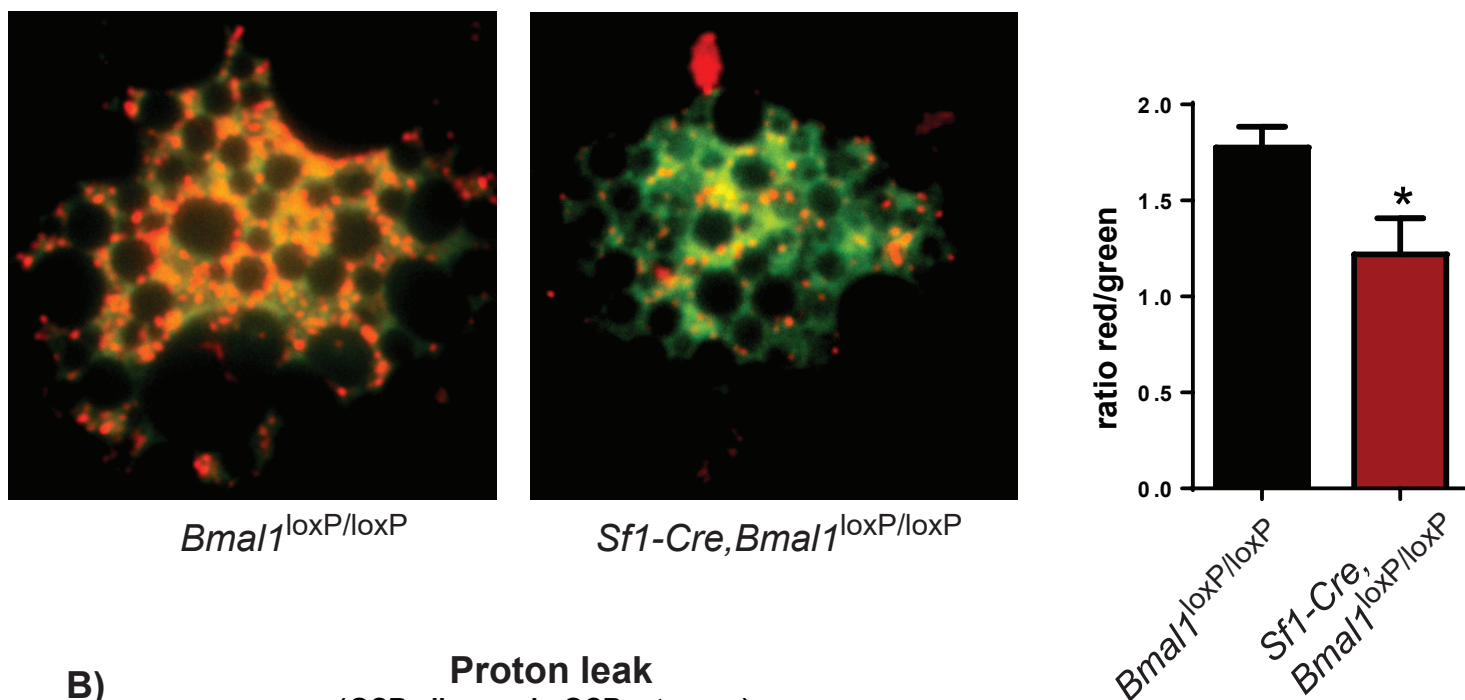

B) Proton leak (OCR oligomycin-OCR rotenone)

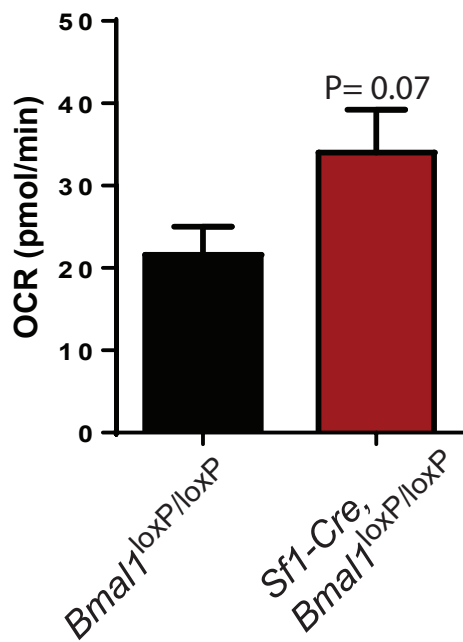

**Figure S1, related to figure 4. Membrane potential analysis and proton leak measurements from isolated brown adipocytes**

A) Left, representative images of isolated brown adipocytes at various differentiation stages evaluated with JC-1 dye staining; right, histogram depicting the quantification of the red/green signals. Regions of high mitochondrial potentials appear as red fluorescence due to J-aggregate, whereas decreased membrane potential regions are shown by the green fluorescence of the JC-1 monomers, B) Histogram showing proton leak measurements from isolated brown adipocytes (\*<0.05; t-test). All plots expressed as means  $\pm$  SEM. n=4-6 mice per genotype, and 4 technical replicates per mouse. OCR, oxygen consumption rate.

**Figure S2, related to figure 5**

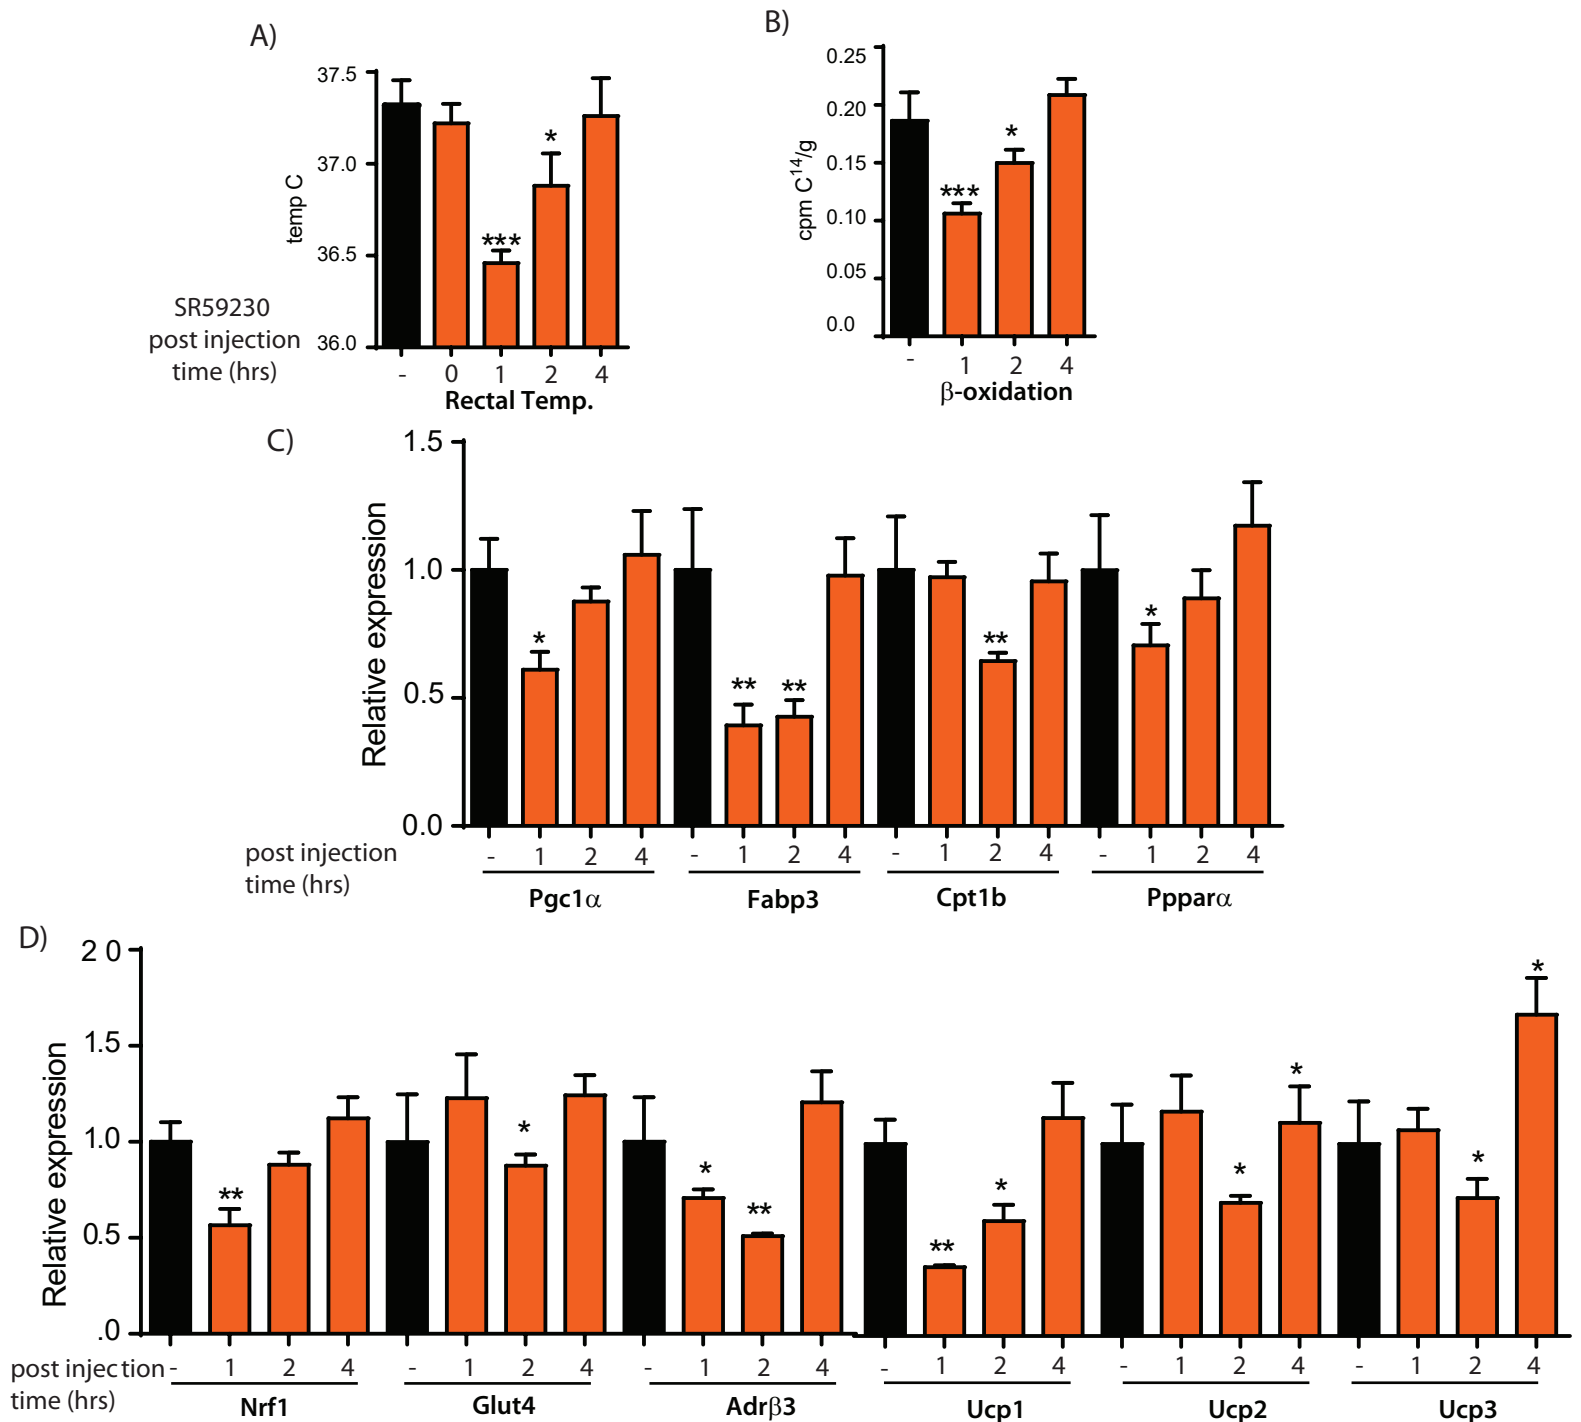

**Figure S2, related to figure 5. Effects of the ADRB3 antagonist SR59230A on rectal temperature, b-oxidation and BAT's gene expression after 1, 2 and 4 hrs post injection.** A) Rectal temperature, B) b-oxidation, C) Thermogenic genes in BAT.

Orange bars, SR59230A intraperitoneal injection; black bar, intraperitoneal water injection

(\* $<0.05$ , \*\* $<0.001$  t-test). All plots expressed as means  $\pm$  SEM. n=5 per time point.

**Figure S3, related to figure 4**

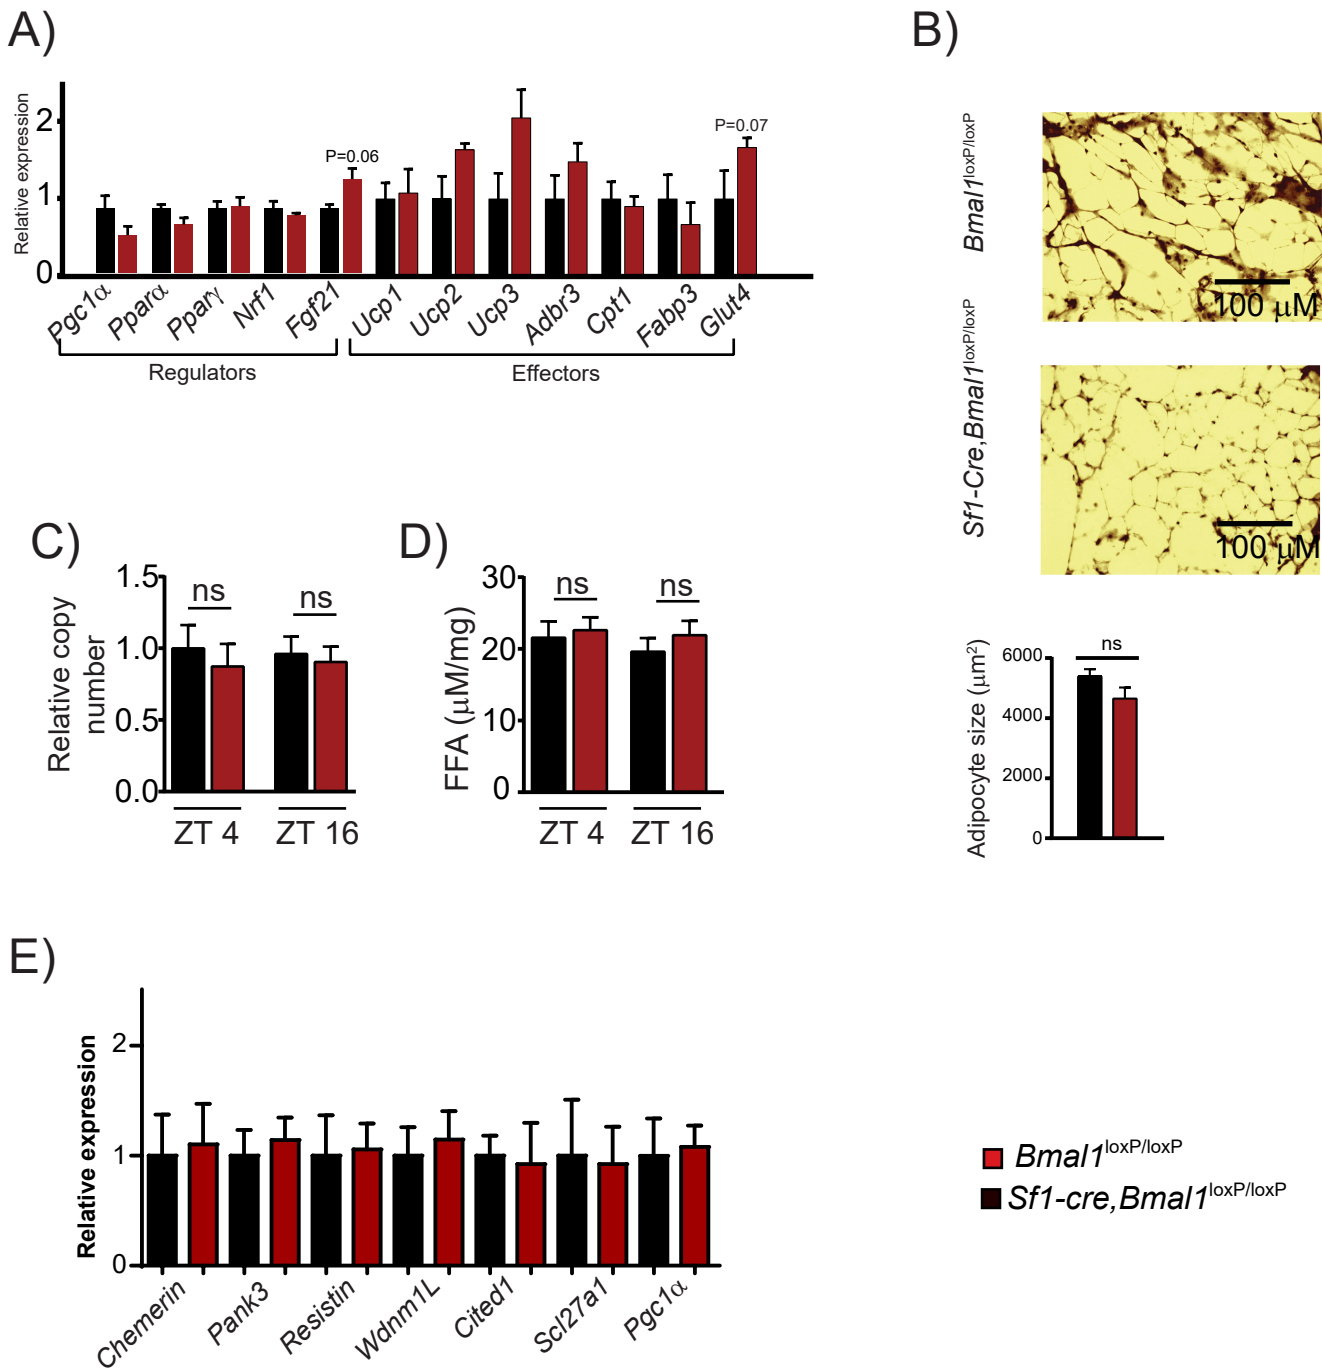

**Figure S3, related to figure 4. Lack of BMAL in the SF1-neurons slightly induce WAT activation** A) Expression of thermogenic regulators and effectors of wat/beige adipocytes. B) Hematoxylin and eosin (H&E) staining; right plot, measured adipocyte size area C) Mitochondrial DNA copy number (mtDNA) D) Free fatty acid content at ZT 4 and ZT 16. E) Expression of WAT and beige markers (A-D, inguinal WAT; E, subcutaneous WAT), (\*<0.05, \*\*<0.001 t-test). All plots expressed as means ± SEM. n=4 per group.

Figure S4, related to figure S3

A)

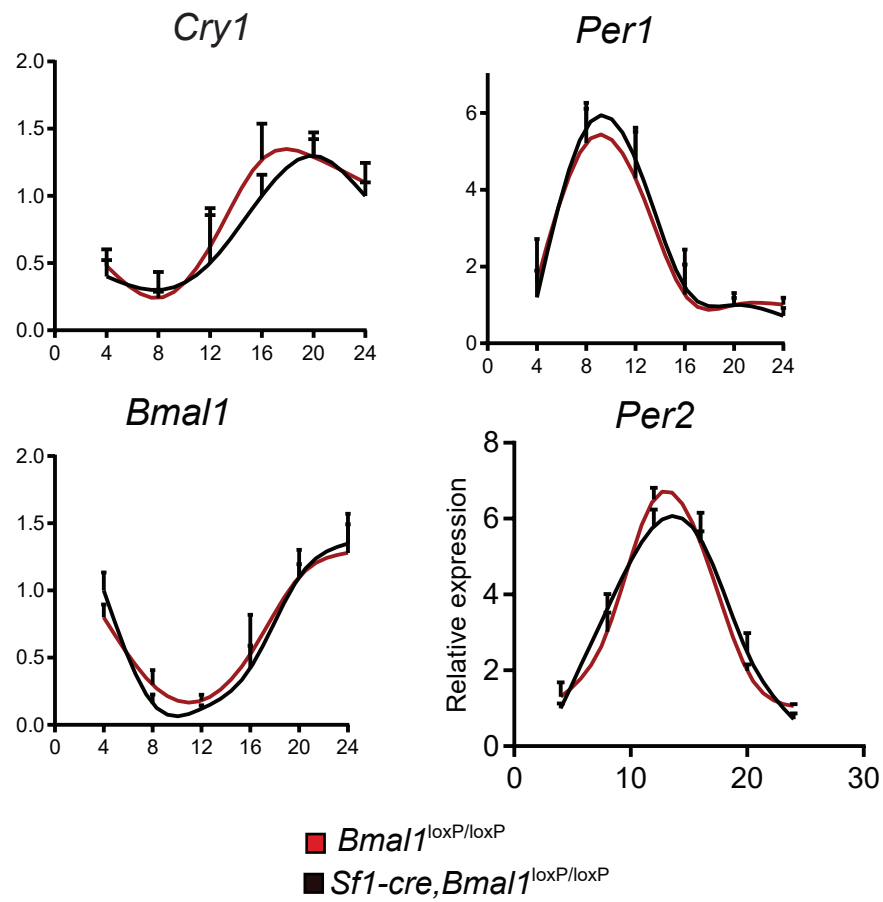

Figure S4, related to figure S3. Lack of BMAL1 in SF1-neurons do not alters the circadian clock in liver.

A) Circadian expression of core-clock genes measured each 4 hrs showing no differences between the genotypes. All plots expressed as means  $\pm$  SEM. n=4, per time point.

Figure S5, related to figure 6

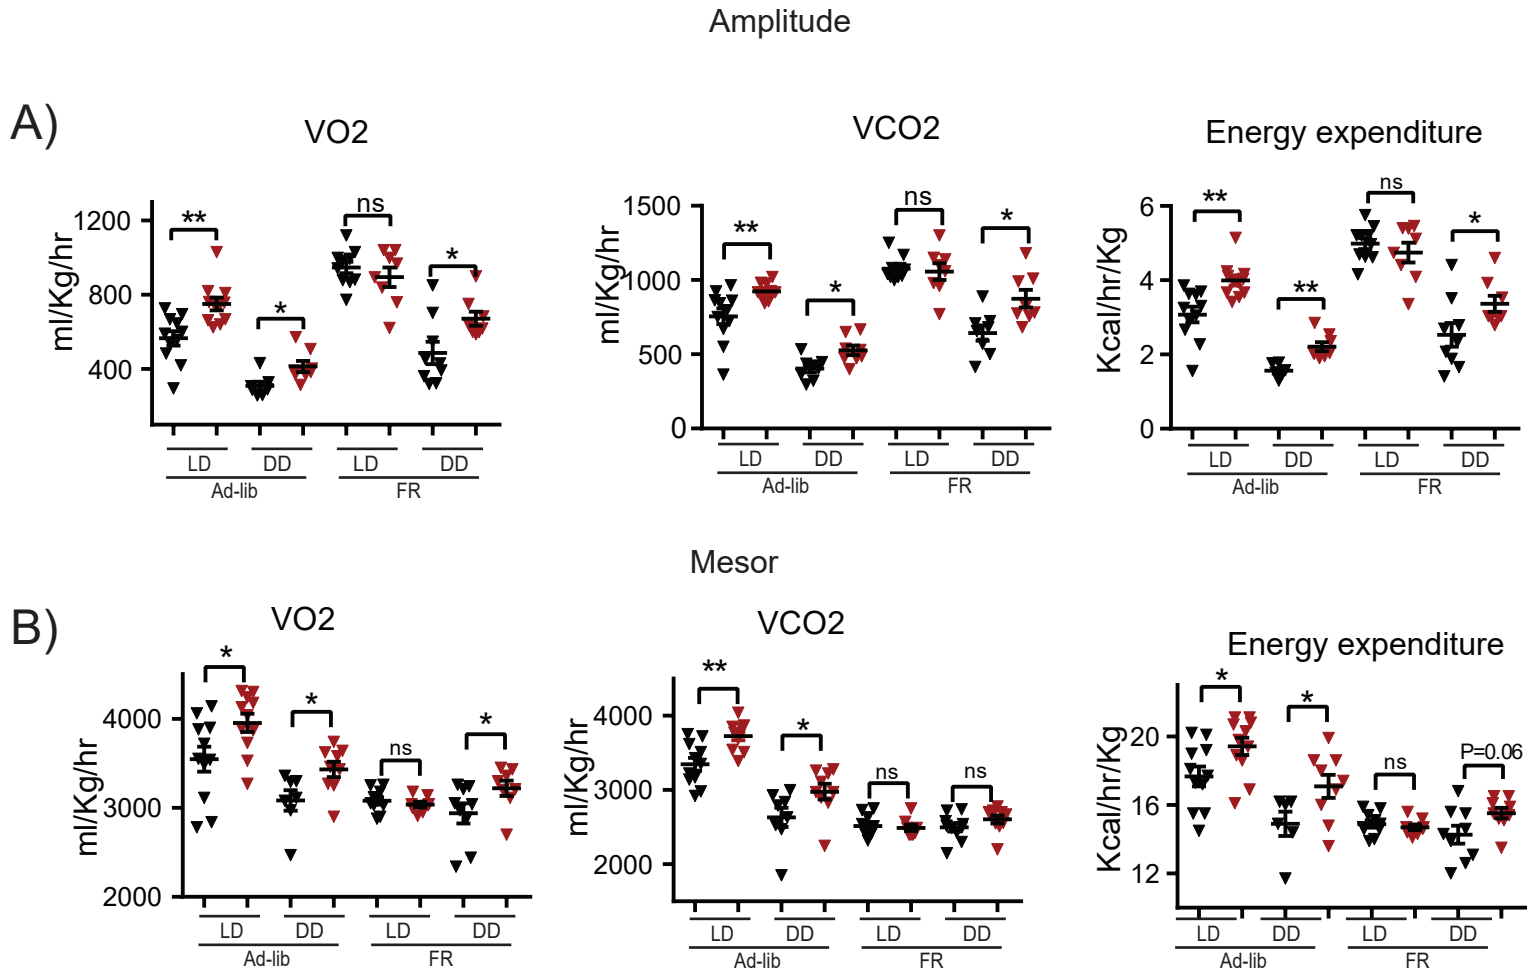

**Figure S5, related to figure 6. Effects on feeding and light conditions on the Amplitude and MESOR, on the circadian respiratory cycles.** The circadian parameters Amplitude and MESOR were computed from the measured values of O<sub>2</sub> consumption, CO<sub>2</sub> production and energy expenditure. A) Amplitude, B) Mesor. LD, Light-dark; DD, constant darkness; Ad-lib, ad-libitum feeding; FR, feeding restriction feeding (from ZT13 to ZT17). (\*<0.05, \*\*<0.001 t-test). All plots expressed as means  $\pm$  SEM. n=8-11 per group.

**Table S1, related to Figure 1**

Effect of genotype and time on the circadian gene expression in the SCN and the VMH.

| 2 way ANOVA | Gene  |              | Interaction      | Time            | Genotype           |
|-------------|-------|--------------|------------------|-----------------|--------------------|
| SCN         | Bmal1 | F            | (5, 42) = 0.4420 | (5, 42) = 3.335 | (1, 42) = 0.5220   |
|             |       | P value      | 0.8166           | 0.0126          | 0.474              |
|             |       | Significance | ns               | *               | ns                 |
|             | Cry1  | F            | (5, 48) = 0.3817 | (5, 48) = 12.15 | (1, 48) = 0.007155 |
|             |       | P value      | 0.8589           | P < 0.0001      | 0.9329             |
|             |       | Significance | ns               | ****            | ns                 |
|             | Per2  | F            | (5, 48) = 0.3255 | (5, 48) = 12.18 | (1, 48) = 0.03808  |
|             |       | P value      | 0.8952           | P < 0.0001      | 0.8461             |
|             |       | Significance | ns               | ****            | ns                 |
|             | Per1  | F            | (5, 48) = 0.2497 | (5, 48) = 19.91 | (1, 48) = 0.3547   |
|             |       | P value      | 0.9379           | P < 0.0001      | 0.5542             |
|             |       | Significance | ns               | ****            | ns                 |
| VMH         | Bmal1 | F            | (5, 48) = 2.626  | (5, 48) = 2.804 | (1, 48) = 160.5    |
|             |       | P value      | 0.0354           | 0.0267          | P < 0.0001         |
|             |       | Significance | *                | *               | ****               |
|             | Cry1  | F            | (5, 48) = 2.193  | (5, 48) = 3.524 | (1, 48) = 119.1    |
|             |       | P value      | 0.0705           | 0.0086          | P < 0.0001         |
|             |       | Significance | ns               | **              | ****               |
|             | Per2  | F            | (5, 48) = 21.01  | (5, 48) = 12.93 | (1, 48) = 22.34    |
|             |       | P value      | P < 0.0001       | P < 0.0001      | P < 0.0001         |
|             |       | Significance | ****             | ****            | ****               |
|             | Per1  | F            | (5, 48) = 2.736  | (5, 48) = 6.177 | (1, 48) = 7.386    |
|             |       | P value      | 0.0297           | 0.0002          | 0.0091             |
|             |       | Significance | *                | ***             | **                 |

**Table S2, related to figure 2**

Effects on respiratory rate analyzed by 2-way ANOVA and ANCOVA statistical methods

| <b>LD Ad-libitum</b>                   |                       | <b>Energy expenditure (EE)</b> |                  | <b>VO2</b> |                  | <b>VCO2</b> |                  |
|----------------------------------------|-----------------------|--------------------------------|------------------|------------|------------------|-------------|------------------|
|                                        |                       | <b>P</b>                       | <b>F</b>         | <b>P</b>   | <b>F</b>         | <b>P</b>    | <b>F</b>         |
| <b>2-way ANOVA</b>                     | <b>Time</b>           | <0.0001                        | F (1, 9) = 640.7 | <0.0001    | F (1, 9) = 511.8 | <0.0001     | F (1, 9) = 177.4 |
|                                        | <b>Genotype</b>       | 0.011                          | F (1, 9) = 10.38 | 0.017      | F (1, 9) = 8.526 | 0.011       | F (1, 9) = 10.06 |
| <b>ANCOVA</b><br>(covariate factor BW) | <b>Genotype ZT 4</b>  | 0.17                           | 2.07             | 0.31       | 1.12             | 0.59        | 0.31             |
|                                        | <b>Genotype ZT 16</b> | 0.048                          | 4.536            | 0.020      | 6.643            | 0.029       | 5.664            |

**Table S3, related to figure 3**

Analysis of the effect of genotype and time on the circadian gene expression in the BAT

| 2 way ANOVA | Gene            |              | Interaction      | Time            | Genotype          |
|-------------|-----------------|--------------|------------------|-----------------|-------------------|
| BAT         | Bmal1           | F            | (5, 48) = 0.1249 | (5, 48) = 6.169 | (1, 48) = 0.09915 |
|             |                 | P value      | 0.9861           | 0.0002          | 0.7542            |
|             |                 | Significance | ns               | ***             | ns                |
|             | Cry1            | F            | (5, 48) = 0.3705 | (5, 48) = 31.57 | (1, 48) = 0.1824  |
|             |                 | P value      | 0.8663           | P < 0.0001      | 0.6712            |
|             |                 | Significance | ns               | ****            | ns                |
|             | Per2            | F            | (5, 48) = 0.3709 | (5, 48) = 36.41 | (1, 48) = 0.6657  |
|             |                 | P value      | 0.8661           | P < 0.0001      | 0.4186            |
|             |                 | Significance | ns               | ****            | ns                |
|             | Per1            | F            | (5, 48) = 0.2114 | (5, 48) = 25.93 | (1, 48) = 0.04639 |
|             |                 | P value      | 0.9561           | P < 0.0001      | 0.8304            |
|             |                 | Significance | ns               | ****            | ns                |
|             | Reberb $\alpha$ | F            | (5, 48) = 0.1352 | (5, 48) = 8.630 | (1, 48) = 1.404   |
|             |                 | P value      | 0.9834           | P < 0.0001      | 0.2419            |
|             |                 | Significance | ns               | ****            | ns                |
|             | Rora            | F            | (5, 48) = 0.7000 | (5, 48) = 6.509 | (1, 48) = 0.6631  |
|             |                 | P value      | 0.6261           | 0.0001          | 0.4195            |
|             |                 | Significance | ns               | ***             | ns                |
|             | Ucp1            | F            | (5, 48) = 0.5448 | (5, 48) = 3.122 | (1, 48) = 18.89   |
|             |                 | P value      | 0.7413           | 0.0161          | P < 0.0001        |
|             |                 | Significance | ns               | *               | ****              |
|             | Ucp2            | F            | (5, 48) = 4.655  | (5, 48) = 7.448 | (1, 48) = 10.29   |
|             |                 | P value      | 0.0015           | P < 0.0001      | 0.0024            |
|             |                 | Significance | **               | ****            | **                |
|             | Ucp3            | F            | (5, 48) = 1.431  | (5, 48) = 8.831 | (1, 48) = 34.98   |
|             |                 | P value      | 0.2301           | P < 0.0001      | P < 0.0001        |
|             |                 | Significance | ns               | ****            | ****              |
|             | Adrb3           | F            | (5, 48) = 1.151  | (5, 48) = 7.531 | (1, 48) = 1.862   |
|             |                 | P value      | 0.3468           | P < 0.0001      | 0.1787            |
|             |                 | Significance | ns               | ****            | ns                |
|             | Nrf1            | F            | (5, 48) = 4.853  | (5, 48) = 38.58 | (1, 48) = 3.200   |
|             |                 | P value      | 0.0011           | P < 0.0001      | 0.08              |
|             |                 | Significance | **               | ****            | ns                |
|             | Cpt1b           | F            | (5, 48) = 3.316  | (5, 48) = 4.997 | (1, 48) = 7.832   |
|             |                 | P value      | 0.0119           | 0.0009          | 0.0074            |
|             |                 | Significance | *                | ***             | **                |
|             | Fabp3           | F            | (5, 48) = 2.123  | (5, 48) = 23.19 | (1, 48) = 0.6570  |
|             |                 | P value      | 0.0787           | P < 0.0001      | 0.4216            |
|             |                 | Significance | ns               | ****            | ns                |



**Table S4, related to figure 5**

Effect on genotype and SR59230A on Sf1.cre;Bmal1<sup>loxP/loxP</sup> and Bmal1<sup>loxP/loxP</sup> mice

| 2-way ANOVA        | Temperature |      | β-oxidation |      | Cpt1b    |      | Fabp3    |      | Nrf1     |      | Pgc1α    |      |
|--------------------|-------------|------|-------------|------|----------|------|----------|------|----------|------|----------|------|
|                    | P value     |      | P value     |      | P value  |      | P value  |      | P value  |      | P value  |      |
| <b>Interaction</b> | 0.2886      | ns   | 0.0981      | ns   | 0.0003   | ***  | 0.0259   | *    | 0.0039   | **   | 0.0012   | **   |
| <b>Genotype</b>    | < 0.0001    | **** | 0.0018      | **   | < 0.0001 | **** | < 0.0001 | **** | < 0.0001 | **** | < 0.0001 | **** |
| <b>SR59230A</b>    | 0.0131      | *    | < 0.0001    | **** | < 0.0001 | **** | 0.0452   | *    | 0.0039   | **   | 0.0039   | **   |
|                    | Pparα       |      | Adrβ3       |      | Glut4    |      | UCP1     |      | UCP2     |      | UCP3     |      |
|                    | P value     |      | P value     |      | P value  |      | P value  |      | P value  |      | P value  |      |
| <b>Interaction</b> | 0.0028      | **   | < 0.0001    | **** | 0.0005   | ***  | 0.7486   | ns   | 0.0059   | **   | 0.0033   | **   |
| <b>Genotype</b>    | < 0.0001    | **** | < 0.0001    | **** | < 0.0001 | **** | < 0.0001 | **** | < 0.0001 | **** | < 0.0001 | **** |
| <b>SR59230A</b>    | < 0.0001    | **** | 0.0491      | *    | 0.0005   | ***  | 0.0486   | *    | 0.0382   | *    | 0.0025   | **   |

**Table S5, related to figures 1, 3, 4, 5, S2, S3, S4**

## Primers used in this study

| Gene name                                                            | Symbol   | Primer forward           | Primer reverse           |
|----------------------------------------------------------------------|----------|--------------------------|--------------------------|
| 18S ribosomal RNA                                                    | 18S      | TGGCTCATTAAATCAGTTATGGT  | GTCCGCATGTATTAGCTCTAG    |
| Adrenoceptor beta 3                                                  | Adrb3    | TTCTGTGTAGCTACGGTGG      | CCATCAAACCTGTTGAGCG      |
| Aryl hydrocarbon receptor nuclear translocator-like (ARNTL)          | Bmal ex4 | AGGCCACAGTCAGATTGAA      | GCTGAACAGCCATCCTTAGC     |
| Beta actine                                                          | Actin    | GGCTGTATTCCCCTCCATCG     | CCAGTTGGTAAACAATGCCATGT  |
| Carnitine palmitoyltransferase I                                     | Cpt1b    | GTGCTTCTTCAAGGTCTGG      | AAGAAAGCAGCACGTTTCAT     |
| Cbp/p300-interacting transactivator 1                                | Cited1   | ATGCCAACCCAGGAGATGAAC    | AGGATGCAGGTTGAAGGATG     |
| Cell death activator                                                 | Cidea    | GCAGCCTGCAGGAACCTATC     | CCATTCTGTCCCTTTTCCA      |
| Chemerin                                                             | Rarres2  | TACAGGTGGCTCTGGAGGAGTTC  | CTTCTCCGTTTGGTTTGATTG    |
| Cryptochrome 1                                                       | Cry1     | CAGACTCACTCAAGCAAGG      | TCAGTTACTGCTCTGCCGCTGGAC |
| Cytochrome c oxidase polypeptide 7A1                                 | Cox7a1   | AAAACCGTGTGGCAGAGAAG     | CCAGCCAAAGCAGTATAAGC     |
| Cytochrome c oxidase subunit 1                                       | Cox1     | ACCATCATTTCTCCTTCTCCTA   | TAGATTTCCGGCTAGAGGTG     |
| cytochrome c oxidase subunit VIIIb                                   | Cox8b    | TGCGAAGTTCACAGTGGTTC     | TGCTGCGGAGCTCTTTTTAT     |
| Epithelial stromal interaction 1                                     | Epsti1   | AGAACTGGCAGACCTGGAGA     | GCTTCTCAGTCTCCTTCTCT     |
| Fatty acid binding protein                                           | Fabp3    | GACGAGGTGACAGCAGATGA     | TGCCATGAGTGAGAGTCAGG     |
| Fatty acid transport protein 1 (Fatp1), Scl271a                      | Scl27a1  | GCTTCAACAGCCGTATCCTC     | TCTTCTGTTGGTGGCACTG      |
| Fibroblast growth factor 21                                          | Fgf21    | AGATCAGGGAGGATGGAACA     | TCAAAGTGAGGCGATCCATA     |
| Forkhead box protein C2                                              | Foxc2    | ATGTTTCGAGAATGGCAGCTT    | GACTTTCCTTCGGCCTCCT      |
| Glucose transporter type 4                                           | Glut4    | CGTCATTGGCATTCTGGTTG     | CGGATGATGTAGAGGTATCTGG   |
| Glyceraldehyde-3-phosphate dehydrogenase                             | Gapdh    | CACTGAGCATCTCCCTCACA     | GTGGGTGCGAGCAACTTTAT     |
| LIM homeobox protein 8                                               | Lhx8     | CGTCAGTCCCAACCATTCTT     | CATTGGATGGGTAACAAGG      |
| Lipase, hormone-sensitive                                            | Lipe     | AAGATCAAAGCCTCAGCGT      | CATATTGCTTCTCGAGGTGC     |
| Nuclear receptor subfamily 1, group D, member 1 (Nr1d1)              | Reverba  | GGGCACAAGCAACATTACCA     | CACGTCCCCACACACCTTAC     |
| Nuclear respiratory factor 1                                         | Nrf1     | CAACAGGGAAGAAACGGAAA     | GCACCACATTCTCAAAGGT      |
| Pantothenate kinase 3                                                | Pank3    | TGCTGTAGTGTCCATTTCTGCCT  | AGCTGGAACAGCAACACCTAGGAA |
| Period 1                                                             | Per1     | ACCAGCGTGTATGATGACATAC   | GTGCACAGCACCCAGTTCCC     |
| Period 2                                                             | Per2     | CGCCTAGAATCCCTCCTGAGA    | CCACCGGCCTGTAGGATCT      |
| Peroxisome proliferator-activated receptor alpha                     | Ppara    | ACAAGGCCTCAGGGTACCA      | GCCGAAAGAAGCCCTTACAG     |
| Peroxisome proliferator-activated receptor gamma                     | Pparg    | CAAGAATACCAAAGTGCATCAA   | GCCGAAAGAAGCCCTTACAG     |
| Peroxisome proliferator-activated receptor gamma coactivator 1-alpha | Pgc1a    | AACCACACCACAGGATCAGA     | TCTTCGCTTATTGCTCCATGA    |
| PR domain containing 16                                              | Prdm16   | CAGCACGGTGAAGCCATTC      | GCGTGATCCGCTTGTG         |
| Pyruvate dehydrogenase kinase, isozyme 4                             | Pdk4     | GAGCTGGTATATCCAGAGCCTGAT | CGAACTTTGACCAGCGTGTCT    |
| Resistin                                                             | Retn     | AAGAACCTTTCATTTCCCCTCCT  | GTCCAGCAATTTAAGCCAATGTT  |
| Thyroid hormone receptor beta                                        | Thrb     | AAGTGCCAGACTTTCAGAGA     | TGCGGGTGACTTTGTCTATG     |
| Type II iodothyronine deiodinase                                     | Dio2     | CCACCTGACCACCTTTCCT      | TGGTCCGGTGCTTCTTAAC      |
| Ubiquitin carboxy-terminal hydrolase L1                              | Uchl1    | GATTAACCCCGAGATGCTGA     | CCTGTCCCTCAGTTCCTCA      |
| Uncoupling protein 1                                                 | Ucp1     | ACTGCCACACTCCAGTCATT     | CTTTGCCTCACTCAGGATTGG    |
| Uncoupling protein 2                                                 | Ucp2     | GCGTCTGGGTACCATCCTA      | GCTCTGAGCCCTTGGTGTAG     |
| Uncoupling protein 3                                                 | Ucp3     | ATGAGTTTTGCCTCCATTCTG    | GGCGTATCATGGCTTGAAT      |
| West-mead DMBA-8 non-metastatic-like                                 | Wdmn1L   | AGTGAGACCTCTGCAGCTTTTAGG | CAACTGTTTTCTTGGTACAGAGC  |
| Zic family member 1                                                  | Zic1     | CAGAGCAGAGCAACCACATC     | CTCCCTGTGTGTCTCTTT       |

## **Supplementary Methods**

### **Brown adipocytes isolation**

Brown adipose tissue dissected from interscapular fat pad was minced in PBS, and an equal amount of isolation buffer (123 mM NaCl, 5mM KCl, 1.3 mM CaCl<sub>2</sub>, 5mM Glucose, 100 mM HEPES) with collagenase (1.5mg/ml) and dispase (2.0 mg/ml) was added. Samples were incubated in 37°C water bath and vortexed for 20 seconds every 5 min during 45 minutes. Digested tissues were filtered through a cell strainer (100 µM) and centrifuged at 800 g for 5 min. Mature adipocytes on the surface and adipocyte precursor cells in the precipitates were collected as dispersed brown adipocyte suspension, washed 2 times with DMEM, and immediately used for subsequent proton leak experiments and membrane potential assay (JC-1 staining).

### **JC-1 Staining**

Isolated brown adipocytes were incubated with 20 µM JC-1 (5,5',6,6'-tetrachloro-1,1',3,3'-tetraethylbenzimidazolylcarbocyanine iodide) for 30 min before observation at green and red emission wavelengths using fluorescence microscope. Images were analyzed using the ImageJ software.

### **Proton leak measurements**

Metabolic rates of cells were measured using a Seahorse Bioscience XF24 Extracellular Flux Analyzer following manufacturer's protocol. Briefly, dispersed brown adipocytes were plated in a 0.2% gelatin coated 24-well Seahorse XF-24 assay plate at  $5 \times 10^4$  cells/well, centrifuged at 400G and pre-incubated in DMEM at 37°C for 1 hr before measurements. The oxygen consumption rate (OCR) values were measured following sequential injection of oligomycin (1.0 µg/ml), carbonyl cyanide p-trifluoromethoxyphenylhydrazone (1.4 µM), and rotenone (5 µM). The proton leak was calculated by subtracting OCR values after rotenone injection from those values after oligomycin injection.
